# Supplementary material for: Minimal Influence of [NiFe] Hydrogenase on Hydrogen Isotope Fractionation in H2-Oxidizing Cupriavidus necator
Source: Front Microbiol. 2017 Oct 4;8:1886. doi: 10.3389/fmicb.2017.01886 (PMC5649130; doi:10.3389/fmicb.2017.01886)
Supplement: Supplementary file 2 [file Data_Sheet_1.XLSX]

## Sheet: fatty acids
Experiment	Strain	Replicate	OD660 at harvest	Generation time (hr)	dD(wat)	dD(H2)	lipid	rel abund	dD	e(L/W)
1	SH-		0.964	27	-24	-591	12:0-OH	0.1
1	SH-		0.964	27	-24	-591	14:0	7.2	-222.8	-203.689
1	SH-		0.964	27	-24	-591	2-OH 14:0	0.7
1	SH-		0.964	27	-24	-591	3-OH 14:0	5.7	-215	-195.697
1	SH-		0.964	27	-24	-591	16:1 D9	0.2
1	SH-		0.964	27	-24	-591	16:0	33.7	-197.7	-177.971
1	SH-		0.964	27	-24	-591	cyc-17 (9,10)	37.5	-226.7	-207.684
1	SH-		0.964	27	-24	-591	16:0-OH(1)	0.2
1	SH-		0.964	27	-24	-591	16:0-OH(2)	0.2
1	SH-		0.964	27	-24	-591	18:1 D9	4.1	-234.6	-215.779
1	SH-		0.964	27	-24	-591	18:1(2)	0.1
1	SH-		0.964	27	-24	-591	18:0	0.4
1	SH-		0.964	27	-24	-591	cyc-19 (9,10)	9.7	-223.2	-204.098
1	SH-		0.964	27	-24	-591	mean		-220	-200.82
1	SH-		0.964	27	-24	-591	weighted mean		-215.7	-196
1	SH-		0.984	28	519	-451	12:0-OH	0.1
1	SH-		0.984	28	519	-451	14:0	7.1	185	-219.882
1	SH-		0.984	28	519	-451	14:0-OH(1)	0.7
1	SH-		0.984	28	519	-451	14:0-OH(2)	5.4	201	-209.348
1	SH-		0.984	28	519	-451	16:1 D9	0.3
1	SH-		0.984	28	519	-451	16:0	35.7	232.3	-188.743
1	SH-		0.984	28	519	-451	cyc-17 (9,10)	36.4	192.5	-214.944
1	SH-		0.984	28	519	-451	16:0-OH(1)	0.2
1	SH-		0.984	28	519	-451	16:0-OH(2)	0.2
1	SH-		0.984	28	519	-451	18:1(1)	3.7	162	-235.023
1	SH-		0.984	28	519	-451	18:1(2)	0.1
1	SH-		0.984	28	519	-451	18:0	0.4
1	SH-		0.984	28	519	-451	19:1	9.7	187	-218.565
1	SH-		0.984	28	519	-451	mean		193.3	-214.417
1	SH-		0.984	28	519	-451	weighted mean		201.123	-209.267
1	SH-		0.989	28	1104	-355	12:0-OH	0.1
1	SH-		0.989	28	1104	-355	14:0	7.4	621	-229.563
1	SH-		0.989	28	1104	-355	14:0-OH(1)	0.6
1	SH-		0.989	28	1104	-355	14:0-OH(2)	5.2	644	-218.631
1	SH-		0.989	28	1104	-355	16:1 D9	0.3
1	SH-		0.989	28	1104	-355	16:0	37.8	686	-198.669
1	SH-		0.989	28	1104	-355	cyc-17 (9,10)	36.6	640	-220.532
1	SH-		0.989	28	1104	-355	16:0-OH(1)	0.2
1	SH-		0.989	28	1104	-355	16:0-OH(2)	0.2
1	SH-		0.989	28	1104	-355	18:1(1)	2.8	577	-250.475
1	SH-		0.989	28	1104	-355	18:1(2)	0.1
1	SH-		0.989	28	1104	-355	18:0	0.4
1	SH-		0.989	28	1104	-355	19:1	8.4	625	-227.662
1	SH-		0.989	28	1104	-355	mean		632.167	-224.255
1	SH-		0.989	28	1104	-355	weighted mean		641.646	-219.75
1	WT		0.922	13	-25	-632	12:0-OH	0.1
1	WT		0.922	13	-25	-632	14:0	6.9	-235.5	-215.897
1	WT		0.922	13	-25	-632	14:0-OH(1)	0.6
1	WT		0.922	13	-25	-632	14:0-OH(2)	7.8	-233	-213.333
1	WT		0.922	13	-25	-632	16:1 D9	0.4
1	WT		0.922	13	-25	-632	16:0	34.2	-219	-198.974
1	WT		0.922	13	-25	-632	cyc-17 (9,10)	35.1	-250.8	-231.59
1	WT		0.922	13	-25	-632	16:0-OH(1)	0.1
1	WT		0.922	13	-25	-632	16:0-OH(2)	0.2
1	WT		0.922	13	-25	-632	18:1(1)	7.5	-255	-235.897
1	WT		0.922	13	-25	-632	18:1(2)	0.1
1	WT		0.922	13	-25	-632	18:0	0.3
1	WT		0.922	13	-25	-632	19:1	6.6	-242	-222.564
1	WT		0.922	13	-25	-632	mean		-239.217	-219.709
1	WT		0.922	13	-25	-632	weighted mean		-237	-217
1	WT		0.938	15	523	-469	12:0-OH	0.2
1	WT		0.938	15	523	-469	14:0	7.1	159	-239.002
1	WT		0.938	15	523	-469	14:0-OH(1)	0.7	154	-242.285
1	WT		0.938	15	523	-469	14:0-OH(2)	7.4	165.1	-234.997
1	WT		0.938	15	523	-469	16:1 D9	0.4
1	WT		0.938	15	523	-469	16:0	36.4	197	-214.051
1	WT		0.938	15	523	-469	cyc-17 (9,10)	33.4	157.9	-239.724
1	WT		0.938	15	523	-469	16:0-OH(1)	0.2
1	WT		0.938	15	523	-469	16:0-OH(2)	0.2
1	WT		0.938	15	523	-469	18:1(1)	7	130	-258.043
1	WT		0.938	15	523	-469	18:1(2)	0.1
1	WT		0.938	15	523	-469	18:0	0.3
1	WT		0.938	15	523	-469	19:1	6.5	157.9	-239.724
1	WT		0.938	15	523	-469	mean		160.129	-238.261
1	WT		0.938	15	523	-469	weighted mean		168.394	-232.834
1	WT		0.927	16	1106	-364	12:0-OH	0.1
1	WT		0.927	16	1106	-364	14:0	6.9	576	-251.662
1	WT		0.927	16	1106	-364	14:0-OH(1)	0.7
1	WT		0.927	16	1106	-364	14:0-OH(2)	7.7	588	-245.964
1	WT		0.927	16	1106	-364	16:1 D9	0.3
1	WT		0.927	16	1106	-364	16:0	36.7	643	-219.848
1	WT		0.927	16	1106	-364	cyc-17 (9,10)	33.9	591	-244.539
1	WT		0.927	16	1106	-364	16:0-OH(1)	0.2
1	WT		0.927	16	1106	-364	16:0-OH(2)	0.2
1	WT		0.927	16	1106	-364	18:1(1)	6.5	540	-268.756
1	WT		0.927	16	1106	-364	18:1(2)	0.1
1	WT		0.927	16	1106	-364	18:0	0.3
1	WT		0.927	16	1106	-364	19:1	6.3	576	-251.662
1	WT		0.927	16	1106	-364	mean		585.667	-247.072
1	WT		0.927	16	1106	-364	weighted mean		592.738	-243.714
1	MBH-		1.03	13	-24	-594	12:0-OH	0.2
1	MBH-		1.03	13	-24	-594	14:0	7	-237	-218.238
1	MBH-		1.03	13	-24	-594	14:0-OH(1)	0.7
1	MBH-		1.03	13	-24	-594	14:0-OH(2)	8.7	-235	-216.189
1	MBH-		1.03	13	-24	-594	16:1 D9	0.3
1	MBH-		1.03	13	-24	-594	16:0	35.8	-233	-214.139
1	MBH-		1.03	13	-24	-594	cyc-17 (9,10)	32.9	-260	-241.803
1	MBH-		1.03	13	-24	-594	16:0-OH(1)	0.1
1	MBH-		1.03	13	-24	-594	16:0-OH(2)	0.3
1	MBH-		1.03	13	-24	-594	18:1(1)	7.5	-255	-236.68
1	MBH-		1.03	13	-24	-594	18:1(2)	0.1
1	MBH-		1.03	13	-24	-594	18:0	0.6
1	MBH-		1.03	13	-24	-594	19:1	5.7	-243	-224.385
1	MBH-		1.03	13	-24	-594	mean		-243.833	-225.239
1	MBH-		1.03	13	-24	-594	weighted mean		-244.8	-226
1	MBH-		1.042	14	524	NA	12:0-OH	0.3
1	MBH-		1.042	14	524	NA	14:0	7.3	142	-250.656
1	MBH-		1.042	14	524	NA	14:0-OH(1)	0.8	144	-249.344
1	MBH-		1.042	14	524	NA	14:0-OH(2)	9.2	149	-246.063
1	MBH-		1.042	14	524	NA	16:1 D9	0.3
1	MBH-		1.042	14	524	NA	16:0	36.4	171	-231.627
1	MBH-		1.042	14	524	NA	cyc-17 (9,10)	31.5	137	-253.937
1	MBH-		1.042	14	524	NA	16:0-OH(1)	0.2
1	MBH-		1.042	14	524	NA	16:0-OH(2)	0.2
1	MBH-		1.042	14	524	NA	18:1(1)	7.9	120	-265.092
1	MBH-		1.042	14	524	NA	18:1(2)	0.1
1	MBH-		1.042	14	524	NA	18:0	0.4
1	MBH-		1.042	14	524	NA	19:1	5.3	148	-246.719
1	MBH-		1.042	14	524	NA	mean		144.429	-249.063
1	MBH-		1.042	14	524	NA	weighted mean		147.949	-246.753
1	MBH-		1.025	15	1110	-364	12:0-OH	0.1
1	MBH-		1.025	15	1110	-364	14:0	7.2	549	-265.877
1	MBH-		1.025	15	1110	-364	14:0-OH(1)	0.8	567	-257.346
1	MBH-		1.025	15	1110	-364	14:0-OH(2)	8.7	575	-253.555
1	MBH-		1.025	15	1110	-364	16:1 D9	0.3
1	MBH-		1.025	15	1110	-364	16:0	37.7	607	-238.389
1	MBH-		1.025	15	1110	-364	cyc-17 (9,10)	31.4	563	-259.242
1	MBH-		1.025	15	1110	-364	16:0-OH(1)	0.2
1	MBH-		1.025	15	1110	-364	16:0-OH(2)	0.2
1	MBH-		1.025	15	1110	-364	18:1(1)	7.5	523	-278.199
1	MBH-		1.025	15	1110	-364	18:1(2)	0
1	MBH-		1.025	15	1110	-364	18:0	0.4
1	MBH-		1.025	15	1110	-364	19:1	5.6	563	-259.242
1	MBH-		1.025	15	1110	-364	mean		563.857	-258.835
1	MBH-		1.025	15	1110	-364	weighted mean		570.463	-255.705
2	SH-	A	NA	NA	-28.3	-439	14:0	7.06106	-212	-189
2	SH-	A	NA	NA	-28.3	-439	16:0	42.6919	-188.3	-165
2	SH-	A	NA	NA	-28.3	-439	cyc-17 (9,10)	38.8147	-214.5	-192
2	SH-	A	NA	NA	-28.3	-439	18:1 D9	2.60836	-207.4	-184
2	SH-	A	NA	NA	-28.3	-439	cyc-19 (9,10)	8.82403	-199.7	-176
2	SH-	B	NA	NA	-27.6	-464	14:0	6.73698	-211.6	-189
2	SH-	B	NA	NA	-27.6	-464	16:0	43.6527	-196.2	-173
2	SH-	B	NA	NA	-27.6	-464	cyc-17 (9,10)	38.8106	-222.3	-200
2	SH-	B	NA	NA	-27.6	-464	18:1 D9	2.04302	-204.8	-182
2	SH-	B	NA	NA	-27.6	-464	cyc-19 (9,10)	8.75668	-219.4	-197
2	SH-	C	NA	NA	-28.2	-445	14:0	7.11565	-211.6	-189
2	SH-	C	NA	NA	-28.2	-445	16:0	43.5523	-191.1	-168
2	SH-	C	NA	NA	-28.2	-445	cyc-17 (9,10)	39.1017	-216.8	-194
2	SH-	C	NA	NA	-28.2	-445	18:1 D9	2.07961	-210.1	-187
2	SH-	C	NA	NA	-28.2	-445	cyc-19 (9,10)	8.15066	-206.5	-183
2	SH-	all			-28	-449.3	mean		-207	-184
2	SH-	all			-28	-449.3	weighted mean		-205	-182
2	MBH-	A	NA	NA	-23.3	-466	14:0	6.81427	-219.8	-201
2	MBH-	A	NA	NA	-23.3	-466	16:0	43.3986	-197.9	-179
2	MBH-	A	NA	NA	-23.3	-466	cyc-17 (9,10)	39.2012	-223.7	-205
2	MBH-	A	NA	NA	-23.3	-466	18:1 D9	2.96228	-222.4	-204
2	MBH-	A	NA	NA	-23.3	-466	cyc-19 (9,10)	7.62359	-216.2	-198
2	MBH-	B	NA	NA	-25.3	-471	14:0	6.81065	-209.2	-189
2	MBH-	B	NA	NA	-25.3	-471	16:0	43.9708	-198.2	-177
2	MBH-	B	NA	NA	-25.3	-471	cyc-17 (9,10)	38.3989	-224.1	-204
2	MBH-	B	NA	NA	-25.3	-471	18:1 D9	3.03247	-218.9	-199
2	MBH-	B	NA	NA	-25.3	-471	cyc-19 (9,10)	7.78718	-211.5	-191
2	MBH-	C	NA	NA	-22.6	-475	14:0	7.10383	-220.3	-202
2	MBH-	C	NA	NA	-22.6	-475	16:0	45.3868	-204.9	-187
2	MBH-	C	NA	NA	-22.6	-475	cyc-17 (9,10)	36.6261	-230.8	-213
2	MBH-	C	NA	NA	-22.6	-475	18:1 D9	2.45907	-230.8	-213
2	MBH-	C	NA	NA	-22.6	-475	cyc-19 (9,10)	8.42421	-229.4	-212
2	MBH-	all			-23.7	-470.7	mean		-217	-198
2	MBH-	all			-23.7	-470.7	weighted mean		-213	-194
2	WT	A	NA	NA	-23.1	-465	14:0	6.77146	-214.7	-196
2	WT	A	NA	NA	-23.1	-465	16:0	43.6394	-201.9	-183
2	WT	A	NA	NA	-23.1	-465	cyc-17 (9,10)	37.1837	-227.3	-209
2	WT	A	NA	NA	-23.1	-465	18:1 D9	2.06942	-228.5	-210
2	WT	A	NA	NA	-23.1	-465	cyc-19 (9,10)	10.336	-229.8	-212
2	WT	B	NA	NA	-25	-483	14:0	6.81877	-217.2	-197
2	WT	B	NA	NA	-25	-483	16:0	43.0588	-204.7	-184
2	WT	B	NA	NA	-25	-483	cyc-17 (9,10)	36.156	-232.6	-213
2	WT	B	NA	NA	-25	-483	18:1 D9	2.8012	-234.6	-215
2	WT	B	NA	NA	-25	-483	cyc-19 (9,10)	11.1652	-236.3	-217
2	WT	C	NA	NA	-24.4	-468	14:0	6.91227	-210.4	-191
2	WT	C	NA	NA	-24.4	-468	16:0	43.5528	-204	-184
2	WT	C	NA	NA	-24.4	-468	cyc-17 (9,10)	37.2107	-227	-208
2	WT	C	NA	NA	-24.4	-468	18:1 D9	2.0818	NA	NA
2	WT	C	NA	NA	-24.4	-468	cyc-19 (9,10)	10.2425	-225.1	-206
2	WT	all			-24.2	-472	mean		-222	-202
2	WT	all			-24.2	-472	weighted mean		-217	-197

## Sheet: Polar Lipids
Experiment	Replicate ID	Strain	Replicate	Compound Class	Headgroup	Major Fatty Acid	Comp Fatty Acid	Mass (Da)	Ret Time (min)	Rel Abund
2	DSM 416 #1 (A)	SH-	A	Bacteriohopanol	NA	NA	NA	724.539	7.32	10.2664
2	DSM 416 #1 (A)	SH-	A	Bacteriohopanol	NA	NA	NA	708.543	8.25	89.7336
2	DSM 416 #1 (A)	SH-	A	Ubiquinone	NA	NA	NA	727.562	15.76	7.54243
2	DSM 416 #1 (A)	SH-	A	Ubiquinone	NA	NA	NA	639.546	16.11	3.13551
2	DSM 416 #1 (A)	SH-	A	Ubiquinone	NA	NA	NA	727.562	16.47	81.4174
2	DSM 416 #1 (A)	SH-	A	Ubiquinone	NA	NA	NA	669.564	16.74	7.90469
2	DSM 416 #1 (A)	SH-	A	Polar Lipid	PG	16:0	cyc-17:0	735.52	10.06	5.91222
2	DSM 416 #1 (A)	SH-	A	Polar Lipid	PE	14:0	cyc-17:0	676.495	10.17	3.02325
2	DSM 416 #1 (A)	SH-	A	Polar Lipid	PE	16:1	cyc-17:0	702.502	10.45	0.445505
2	DSM 416 #1 (A)	SH-	A	Polar Lipid	PE	16:1	16:0	690.509	10.73	0.865434
2	DSM 416 #1 (A)	SH-	A	Polar Lipid	PE	16:1	18:1	716.524	10.94	0.439801
2	DSM 416 #1 (A)	SH-	A	Polar Lipid	PE	cyc-17:0	cyc-17:0	716.524	11.5	4.22974
2	DSM 416 #1 (A)	SH-	A	Polar Lipid	PE	16:0	cyc-17:0	704.528	11.7	47.306
2	DSM 416 #1 (A)	SH-	A	Polar Lipid	PE	16:0	16:0	692.518	11.94	11.7457
2	DSM 416 #1 (A)	SH-	A	Polar Lipid	PE	16:0	18:1	718.535	12.15	1.25815
2	DSM 416 #1 (A)	SH-	A	Polar Lipid	PE	cyc-17:0	cyc-19:0	744.557	12.9	20.462
2	DSM 416 #1 (A)	SH-	A	Polar Lipid	PE	16:0	cyc-19:0	732.551	13.15	4.31229
2	DSM 416 #2 (B)	SH-	B	Bacteriohopanol	NA	NA	NA	724.539	7.32	6.9695
2	DSM 416 #2 (B)	SH-	B	Bacteriohopanol	NA	NA	NA	708.543	8.25	93.0305
2	DSM 416 #2 (B)	SH-	B	Ubiquinone	NA	NA	NA	727.562	15.76	0
2	DSM 416 #2 (B)	SH-	B	Ubiquinone	NA	NA	NA	639.546	16.11	1.82264
2	DSM 416 #2 (B)	SH-	B	Ubiquinone	NA	NA	NA	727.562	16.47	96.0144
2	DSM 416 #2 (B)	SH-	B	Ubiquinone	NA	NA	NA	669.564	16.74	2.16299
2	DSM 416 #2 (B)	SH-	B	Polar Lipid	PG	16:0	cyc-17:0	735.52	10.06	1.75938
2	DSM 416 #2 (B)	SH-	B	Polar Lipid	PE	14:0	cyc-17:0	676.495	10.17	1.50664
2	DSM 416 #2 (B)	SH-	B	Polar Lipid	PE	16:1	cyc-17:0	702.502	10.45	0.210534
2	DSM 416 #2 (B)	SH-	B	Polar Lipid	PE	16:1	16:0	690.509	10.73	0.543741
2	DSM 416 #2 (B)	SH-	B	Polar Lipid	PE	16:1	18:1	716.524	10.94	0.273855
2	DSM 416 #2 (B)	SH-	B	Polar Lipid	PE	cyc-17:0	cyc-17:0	716.524	11.5	2.37044
2	DSM 416 #2 (B)	SH-	B	Polar Lipid	PE	16:0	cyc-17:0	704.528	11.7	67.9665
2	DSM 416 #2 (B)	SH-	B	Polar Lipid	PE	16:0	16:0	692.518	11.94	7.04478
2	DSM 416 #2 (B)	SH-	B	Polar Lipid	PE	16:0	18:1	718.535	12.15	0.616908
2	DSM 416 #2 (B)	SH-	B	Polar Lipid	PE	cyc-17:0	cyc-19:0	744.557	12.9	15.1514
2	DSM 416 #2 (B)	SH-	B	Polar Lipid	PE	16:0	cyc-19:0	732.551	13.15	2.55583
2	DSM 416 #3 (C)	SH-	C	Bacteriohopanol	NA	NA	NA	724.539	7.32	5.40379
2	DSM 416 #3 (C)	SH-	C	Bacteriohopanol	NA	NA	NA	708.543	8.25	94.5962
2	DSM 416 #3 (C)	SH-	C	Ubiquinone	NA	NA	NA	727.562	15.76	3.77273
2	DSM 416 #3 (C)	SH-	C	Ubiquinone	NA	NA	NA	639.546	16.11	2.02392
2	DSM 416 #3 (C)	SH-	C	Ubiquinone	NA	NA	NA	727.562	16.47	88.6698
2	DSM 416 #3 (C)	SH-	C	Ubiquinone	NA	NA	NA	669.564	16.74	5.53355
2	DSM 416 #3 (C)	SH-	C	Polar Lipid	PG	16:0	cyc-17:0	735.52	10.06	3.18215
2	DSM 416 #3 (C)	SH-	C	Polar Lipid	PE	14:0	cyc-17:0	676.495	10.17	1.96387
2	DSM 416 #3 (C)	SH-	C	Polar Lipid	PE	16:1	cyc-17:0	702.502	10.45	0.293316
2	DSM 416 #3 (C)	SH-	C	Polar Lipid	PE	16:1	16:0	690.509	10.73	0.702736
2	DSM 416 #3 (C)	SH-	C	Polar Lipid	PE	16:1	18:1	716.524	10.94	0.312024
2	DSM 416 #3 (C)	SH-	C	Polar Lipid	PE	cyc-17:0	cyc-17:0	716.524	11.5	2.77737
2	DSM 416 #3 (C)	SH-	C	Polar Lipid	PE	16:0	cyc-17:0	704.528	11.7	66.1258
2	DSM 416 #3 (C)	SH-	C	Polar Lipid	PE	16:0	16:0	692.518	11.94	7.31638
2	DSM 416 #3 (C)	SH-	C	Polar Lipid	PE	16:0	18:1	718.535	12.15	0.674313
2	DSM 416 #3 (C)	SH-	C	Polar Lipid	PE	cyc-17:0	cyc-19:0	744.557	12.9	14.3534
2	DSM 416 #3 (C)	SH-	C	Polar Lipid	PE	16:0	cyc-19:0	732.551	13.15	2.29866
2	DSM 418 #1 (D)	MBH-	A	Bacteriohopanol	NA	NA	NA	724.539	7.32	7.7394
2	DSM 418 #1 (D)	MBH-	A	Bacteriohopanol	NA	NA	NA	708.543	8.25	92.2606
2	DSM 418 #1 (D)	MBH-	A	Ubiquinone	NA	NA	NA	727.562	15.76	0.213545
2	DSM 418 #1 (D)	MBH-	A	Ubiquinone	NA	NA	NA	639.546	16.11	2.53287
2	DSM 418 #1 (D)	MBH-	A	Ubiquinone	NA	NA	NA	727.562	16.47	95.0443
2	DSM 418 #1 (D)	MBH-	A	Ubiquinone	NA	NA	NA	669.564	16.74	2.20929
2	DSM 418 #1 (D)	MBH-	A	Polar Lipid	PG	16:0	cyc-17:0	735.52	10.06	2.70273
2	DSM 418 #1 (D)	MBH-	A	Polar Lipid	PE	14:0	cyc-17:0	676.495	10.17	1.67563
2	DSM 418 #1 (D)	MBH-	A	Polar Lipid	PE	16:1	cyc-17:0	702.502	10.45	0.275741
2	DSM 418 #1 (D)	MBH-	A	Polar Lipid	PE	16:1	16:0	690.509	10.73	0.924375
2	DSM 418 #1 (D)	MBH-	A	Polar Lipid	PE	16:1	18:1	716.524	10.94	0.467489
2	DSM 418 #1 (D)	MBH-	A	Polar Lipid	PE	cyc-17:0	cyc-17:0	716.524	11.5	2.81505
2	DSM 418 #1 (D)	MBH-	A	Polar Lipid	PE	16:0	cyc-17:0	704.528	11.7	64.7889
2	DSM 418 #1 (D)	MBH-	A	Polar Lipid	PE	16:0	16:0	692.518	11.94	8.26142
2	DSM 418 #1 (D)	MBH-	A	Polar Lipid	PE	16:0	18:1	718.535	12.15	0.904856
2	DSM 418 #1 (D)	MBH-	A	Polar Lipid	PE	cyc-17:0	cyc-19:0	744.557	12.9	14.6108
2	DSM 418 #1 (D)	MBH-	A	Polar Lipid	PE	16:0	cyc-19:0	732.551	13.15	2.57305
2	DSM 418 #2 (E)	MBH-	B	Bacteriohopanol	NA	NA	NA	724.539	7.32	12.1478
2	DSM 418 #2 (E)	MBH-	B	Bacteriohopanol	NA	NA	NA	708.543	8.25	87.8522
2	DSM 418 #2 (E)	MBH-	B	Ubiquinone	NA	NA	NA	727.562	15.76	6.00246
2	DSM 418 #2 (E)	MBH-	B	Ubiquinone	NA	NA	NA	639.546	16.11	3.04033
2	DSM 418 #2 (E)	MBH-	B	Ubiquinone	NA	NA	NA	727.562	16.47	83.3557
2	DSM 418 #2 (E)	MBH-	B	Ubiquinone	NA	NA	NA	669.564	16.74	7.60154
2	DSM 418 #2 (E)	MBH-	B	Polar Lipid	PG	16:0	cyc-17:0	735.52	10.06	5.78388
2	DSM 418 #2 (E)	MBH-	B	Polar Lipid	PE	14:0	cyc-17:0	676.495	10.17	2.41297
2	DSM 418 #2 (E)	MBH-	B	Polar Lipid	PE	16:1	cyc-17:0	702.502	10.45	0.349578
2	DSM 418 #2 (E)	MBH-	B	Polar Lipid	PE	16:1	16:0	690.509	10.73	1.35041
2	DSM 418 #2 (E)	MBH-	B	Polar Lipid	PE	16:1	18:1	716.524	10.94	0.747172
2	DSM 418 #2 (E)	MBH-	B	Polar Lipid	PE	cyc-17:0	cyc-17:0	716.524	11.5	3.60509
2	DSM 418 #2 (E)	MBH-	B	Polar Lipid	PE	16:0	cyc-17:0	704.528	11.7	51.7724
2	DSM 418 #2 (E)	MBH-	B	Polar Lipid	PE	16:0	16:0	692.518	11.94	11.1789
2	DSM 418 #2 (E)	MBH-	B	Polar Lipid	PE	16:0	18:1	718.535	12.15	1.2479
2	DSM 418 #2 (E)	MBH-	B	Polar Lipid	PE	cyc-17:0	cyc-19:0	744.557	12.9	17.8635
2	DSM 418 #2 (E)	MBH-	B	Polar Lipid	PE	16:0	cyc-19:0	732.551	13.15	3.68814
2	DSM 418 #3 (F)	MBH-	C	Bacteriohopanol	NA	NA	NA	724.539	7.32	15.7944
2	DSM 418 #3 (F)	MBH-	C	Bacteriohopanol	NA	NA	NA	708.543	8.25	84.2056
2	DSM 418 #3 (F)	MBH-	C	Ubiquinone	NA	NA	NA	727.562	15.76	5.7812
2	DSM 418 #3 (F)	MBH-	C	Ubiquinone	NA	NA	NA	639.546	16.11	3.77673
2	DSM 418 #3 (F)	MBH-	C	Ubiquinone	NA	NA	NA	727.562	16.47	82.3123
2	DSM 418 #3 (F)	MBH-	C	Ubiquinone	NA	NA	NA	669.564	16.74	8.12976
2	DSM 418 #3 (F)	MBH-	C	Polar Lipid	PG	16:0	cyc-17:0	735.52	10.06	8.62794
2	DSM 418 #3 (F)	MBH-	C	Polar Lipid	PE	14:0	cyc-17:0	676.495	10.17	3.39045
2	DSM 418 #3 (F)	MBH-	C	Polar Lipid	PE	16:1	cyc-17:0	702.502	10.45	0.318628
2	DSM 418 #3 (F)	MBH-	C	Polar Lipid	PE	16:1	16:0	690.509	10.73	2.34372
2	DSM 418 #3 (F)	MBH-	C	Polar Lipid	PE	16:1	18:1	716.524	10.94	1.25475
2	DSM 418 #3 (F)	MBH-	C	Polar Lipid	PE	cyc-17:0	cyc-17:0	716.524	11.5	3.78713
2	DSM 418 #3 (F)	MBH-	C	Polar Lipid	PE	16:0	cyc-17:0	704.528	11.7	39.3761
2	DSM 418 #3 (F)	MBH-	C	Polar Lipid	PE	16:0	16:0	692.518	11.94	14.0535
2	DSM 418 #3 (F)	MBH-	C	Polar Lipid	PE	16:0	18:1	718.535	12.15	1.83989
2	DSM 418 #3 (F)	MBH-	C	Polar Lipid	PE	cyc-17:0	cyc-19:0	744.557	12.9	18.8853
2	DSM 418 #3 (F)	MBH-	C	Polar Lipid	PE	16:0	cyc-19:0	732.551	13.15	6.12257
2	DSM 428 #1 (G)	WT	A	Bacteriohopanol	NA	NA	NA	724.539	7.32	12.7409
2	DSM 428 #1 (G)	WT	A	Bacteriohopanol	NA	NA	NA	708.543	8.25	87.2591
2	DSM 428 #1 (G)	WT	A	Ubiquinone	NA	NA	NA	727.562	15.76	8.27555
2	DSM 428 #1 (G)	WT	A	Ubiquinone	NA	NA	NA	639.546	16.11	2.51535
2	DSM 428 #1 (G)	WT	A	Ubiquinone	NA	NA	NA	727.562	16.47	82.121
2	DSM 428 #1 (G)	WT	A	Ubiquinone	NA	NA	NA	669.564	16.74	7.08807
2	DSM 428 #1 (G)	WT	A	Polar Lipid	PG	16:0	cyc-17:0	735.52	10.06	4.98359
2	DSM 428 #1 (G)	WT	A	Polar Lipid	PE	14:0	cyc-17:0	676.495	10.17	1.86975
2	DSM 428 #1 (G)	WT	A	Polar Lipid	PE	16:1	cyc-17:0	702.502	10.45	0.131258
2	DSM 428 #1 (G)	WT	A	Polar Lipid	PE	16:1	16:0	690.509	10.73	0.702132
2	DSM 428 #1 (G)	WT	A	Polar Lipid	PE	16:1	18:1	716.524	10.94	0.484712
2	DSM 428 #1 (G)	WT	A	Polar Lipid	PE	cyc-17:0	cyc-17:0	716.524	11.5	2.886
2	DSM 428 #1 (G)	WT	A	Polar Lipid	PE	16:0	cyc-17:0	704.528	11.7	50.2656
2	DSM 428 #1 (G)	WT	A	Polar Lipid	PE	16:0	16:0	692.518	11.94	11.7022
2	DSM 428 #1 (G)	WT	A	Polar Lipid	PE	16:0	18:1	718.535	12.15	0.915919
2	DSM 428 #1 (G)	WT	A	Polar Lipid	PE	cyc-17:0	cyc-19:0	744.557	12.9	21.1939
2	DSM 428 #1 (G)	WT	A	Polar Lipid	PE	16:0	cyc-19:0	732.551	13.15	4.8649
2	DSM 428 #2 (H)	WT	B	Bacteriohopanol	NA	NA	NA	724.539	7.32	21.0218
2	DSM 428 #2 (H)	WT	B	Bacteriohopanol	NA	NA	NA	708.543	8.25	78.9782
2	DSM 428 #2 (H)	WT	B	Ubiquinone	NA	NA	NA	727.562	15.76	10.2018
2	DSM 428 #2 (H)	WT	B	Ubiquinone	NA	NA	NA	639.546	16.11	3.02679
2	DSM 428 #2 (H)	WT	B	Ubiquinone	NA	NA	NA	727.562	16.47	77.7126
2	DSM 428 #2 (H)	WT	B	Ubiquinone	NA	NA	NA	669.564	16.74	9.0588
2	DSM 428 #2 (H)	WT	B	Polar Lipid	PG	16:0	cyc-17:0	735.52	10.06	7.568
2	DSM 428 #2 (H)	WT	B	Polar Lipid	PE	14:0	cyc-17:0	676.495	10.17	2.65543
2	DSM 428 #2 (H)	WT	B	Polar Lipid	PE	16:1	cyc-17:0	702.502	10.45	0.194845
2	DSM 428 #2 (H)	WT	B	Polar Lipid	PE	16:1	16:0	690.509	10.73	1.31259
2	DSM 428 #2 (H)	WT	B	Polar Lipid	PE	16:1	18:1	716.524	10.94	1.00528
2	DSM 428 #2 (H)	WT	B	Polar Lipid	PE	cyc-17:0	cyc-17:0	716.524	11.5	3.6975
2	DSM 428 #2 (H)	WT	B	Polar Lipid	PE	16:0	cyc-17:0	704.528	11.7	36.9874
2	DSM 428 #2 (H)	WT	B	Polar Lipid	PE	16:0	16:0	692.518	11.94	14.2205
2	DSM 428 #2 (H)	WT	B	Polar Lipid	PE	16:0	18:1	718.535	12.15	2.06017
2	DSM 428 #2 (H)	WT	B	Polar Lipid	PE	cyc-17:0	cyc-19:0	744.557	12.9	22.3951
2	DSM 428 #2 (H)	WT	B	Polar Lipid	PE	16:0	cyc-19:0	732.551	13.15	7.90325
2	DSM 428 #3 (I)	WT	C	Bacteriohopanol	NA	NA	NA	724.539	7.32	13.756
2	DSM 428 #3 (I)	WT	C	Bacteriohopanol	NA	NA	NA	708.543	8.25	86.244
2	DSM 428 #3 (I)	WT	C	Ubiquinone	NA	NA	NA	727.562	15.76	7.80279
2	DSM 428 #3 (I)	WT	C	Ubiquinone	NA	NA	NA	639.546	16.11	2.64665
2	DSM 428 #3 (I)	WT	C	Ubiquinone	NA	NA	NA	727.562	16.47	82.2759
2	DSM 428 #3 (I)	WT	C	Ubiquinone	NA	NA	NA	669.564	16.74	7.27467
2	DSM 428 #3 (I)	WT	C	Polar Lipid	PG	16:0	cyc-17:0	735.52	10.06	5.05835
2	DSM 428 #3 (I)	WT	C	Polar Lipid	PE	14:0	cyc-17:0	676.495	10.17	2.01909
2	DSM 428 #3 (I)	WT	C	Polar Lipid	PE	16:1	cyc-17:0	702.502	10.45	0.142554
2	DSM 428 #3 (I)	WT	C	Polar Lipid	PE	16:1	16:0	690.509	10.73	0.608225
2	DSM 428 #3 (I)	WT	C	Polar Lipid	PE	16:1	18:1	716.524	10.94	0.38683
2	DSM 428 #3 (I)	WT	C	Polar Lipid	PE	cyc-17:0	cyc-17:0	716.524	11.5	3.00386
2	DSM 428 #3 (I)	WT	C	Polar Lipid	PE	16:0	cyc-17:0	704.528	11.7	49.8708
2	DSM 428 #3 (I)	WT	C	Polar Lipid	PE	16:0	16:0	692.518	11.94	11.7129
2	DSM 428 #3 (I)	WT	C	Polar Lipid	PE	16:0	18:1	718.535	12.15	0.859084
2	DSM 428 #3 (I)	WT	C	Polar Lipid	PE	cyc-17:0	cyc-19:0	744.557	12.9	21.511
2	DSM 428 #3 (I)	WT	C	Polar Lipid	PE	16:0	cyc-19:0	732.551	13.15	4.82727

## Sheet: growth curves
All values are optical density (OD) at 660 nm
Experiment 1 (2008)
elapsed hours	elapsed days	SH- low D water	MBH- low D water	WT low D water	SH- med D water	MBH- med D water	WT med D water	SH- high D water	MBH- high D water	WT high D water	neg control
0	0	0.054	0.054	0.066	0.082	0.07	0.08	0.066	0.08	0.088	0.062
20.3	1	0.05	0.05	0.057	0.08	0.066	0.074	0.064	0.079	0.088	0.062
44.8	2	0.06	0.063	0.07	0.086	0.075	0.089	0.072	0.089	0.101	0.052
69.4	3	0.055	0.237	0.262	0.087	0.255	0.275	0.084	0.252	0.299	0.052
92.4	4	0.068	0.488	0.454	0.108	0.492	0.459	0.126	0.477	0.487	0.057
116.8	5	0.118	0.709	0.645	0.196	0.708	0.649	0.23	0.696	0.651	0.055
141.2	6	0.242	0.907	0.812	0.317	0.912	0.822	0.347	0.895	0.815	0.064
164.9	7	0.35	1.03	0.922	0.409	1.042	0.938	0.445	1.025	0.927	0.052
237.8	10	0.426			0.49			0.527			0.055
260.3	11	0.504			0.553			0.567			0.056
284.5	12	0.607			0.643			0.657			0.053
308.3	13	0.723			0.756			0.77			0.055
332.2	14	0.79			0.819			0.829			0.057
355	15	0.867			0.91			0.904			0.057
381.3	16	0.964			0.984			0.989			0.055
Experiment 2 (2017)
elapsed hours	elapsed days	SH- rep 1	SH- rep 2	SH- rep 3	MBH- rep 1	MBH- rep 2	MBH- rep 3	WT rep 1	WT rep 2	WT rep 3
24	0	-0.0019	-0.0019	-0.0019	-0.0019	-0.0019	-0.0019	-0.0019	-0.0019	-0.0019
48	1	0.088972	0.0707976	0.11169	0.229824	0.204834	0.184388	0.141223	0.173029	0.118505
72	2	0.0617104	0.102603	0.13668	0.272988	0.22528	0.252542	0.213921	0.184388	0.141223
96	3	0.054895	0.0798848	0.138952	0.297978	0.266172	0.282075	0.202562	0.193475	0.196655
120	4	0.11169	0.138952	0.120777	0.438829	0.454732	0.495624	0.25027	0.223008	0.234367
144	5	0.170757	0.198018	0.218465	0.51607	0.556963	0.572865	0.400209	0.366132	0.425198
168	6	0.302521	0.320696	0.375219	0.56605	0.604671	0.634204	0.509255	0.443373	0.472906
192	7	0.418383	0.384306	0.436557	0.61603	0.697814	0.745522	0.550147	0.56605	0.538788
216	8	0.50244	0.475178	0.457004	0.727348	0.754609	0.868199	0.604671	0.606942	0.620573
240	9	0.525158	0.525158	0.479722	0.822763	0.81822	0.97043	0.634204	0.715989	0.661466
264	10	0.568322	0.56605	0.525158	0.825035	0.850025	1.03631	0.720532	0.727348	0.70463
288	11	0.636476	0.627389	0.561506	0.88183	0.93181	1.1181	0.802317	0.834122	0.761425
312	12	0.693271	0.709173	0.634204	0.90682	0.947712	1.21578	0.822763	0.909092	0.820492
336	13	0.734163	0.727348	0.675096	0.974974	1.03858	1.46341	0.895461	1.00451	0.909092
360	14	0.775056	0.79323	0.736435	1.03177	1.08175	1.49294	0.997692	1.10901	0.981789
384	15	0.868199	0.895461	0.809133	1.0772	1.14082	1.48386	0.993148	1.22487	1.07948
408	16	0.927266	0.915907	0.852297	1.12264	1.22942	1.58609	1.08402	1.26349	1.14309
432	17	1.07948	0.959071	0.911364	1.2067	1.24532	1.67696	1.14309	1.35209	1.22942
456	18	1.04994	1.0454	0.959071	1.26122	1.36572	1.74966	1.20215	1.39526	1.30438
480	19	1.08175	1.05903	1.01587	1.28167	1.39071	1.811	1.25895	1.50203	1.32937
504	20	1.1181	1.07039	1.0454	1.28394	1.40662	1.82008	1.2794	1.52248	1.36572
528	21	1.15445	1.10447	1.06585	1.25895	1.42025	1.83599	1.31574	1.55428	1.40662
552	22	1.23169	1.15672	1.12491	1.32937	1.47023	1.94503	1.36118	1.61789	1.48613
576	23	1.24305	1.16126	1.18398	1.37481	1.50203	1.99728	1.41797	1.67014	1.52475
